# Supplementary material for: Evaluation of both exonic and intronic variants for effects on RNA splicing allows for accurate assessment of the effectiveness of precision therapies
Source: PLoS Genet. 2020 Oct 21;16(10):e1009100. doi: 10.1371/journal.pgen.1009100 (PMC7605713; doi:10.1371/journal.pgen.1009100)
Supplement: S2 Table — (XLSX) [file pgen.1009100.s012.xlsx]

## Sheet: Sheet1
	Nucleotide change	SDM-F	SDM-R
	c.166 G>A (E56K)	GGTCCCACTTTTTATTCTTTTGCAGAAAATGGGATAGAGAGC	GCTCTCTATCCCATTTTCTGCAAAAGAATAAAAAGTGGGACC
	c.274 G>A (E92K)	CTGTTTTTCCCCTTTTGTAGAAAGTCACCAAAGCAGTACAG	CTGTACTGCTTTGGTGACTTTCTACAAAAGGGGAAAAACAG
	c.580 G>A (G194R)	GCTGTGCTTTTATTTTCCAGAGACTTGCATTGGCACATTTCG	CGAAATGTGCCAATGCAAGTCTCTGGAAAATAAAAGCACAGC
	c.581 G>T (G194V)	GCTGTGCTTTTATTTTCCAGGTACTTGCATTGGCACATTTCG	CGAAATGTGCCAATGCAAGTACCTGGAAAATAAAAGCACAGC
	c.2909 G>A (G970D)	GGAGAATCTATTAAGAATCCCATCTATAATATACAAGATGACAAATTCCTC	GAGGAATTTGTCATCTTGTATATTATAGATGGGATTCTTAATAGATTCTCC
	c.3719 T>G (V1240G)	CATCACTTTTACCTTATAGGGGGGCCTCTTGGGAAGAACTG	CAGTTCTTCCCAAGAGGCCCCCCTATAAGGTAAAAGTGATG
	c.454 A>G (M152V)37	previously reported	previously reported
	c.523A>G (I175V)	GTCAAGCCGTGTTCTAGATAAAGTAAGTATTGGACAACT	AGTTGTCCAATACTTACTTTATCTAGAACACGGCTTGAC
	c.2816 A>G (H939R)37	previously reported	previously reported
	c.2908 G>C (G970R)	CAACACGTTGAAAGCACGTACTTTACTAGGTCTAAG	CTTAGACCTAGTAAAGTACGTGCTTTCAACGTGTTG
	c.2908 G>A (G970S)	CAACACGTTGAAAGCAAGTACTTTACTAGGTCTAAG	CTTAGACCTAGTAAAGTACTTGCTTTCAACGTGTTG
	c.3717 G>C (R1239S)	TAAGTCCTGGCCAGAGCGTGAGATTTGAACACTG	CAGTGTTCAAATCTCACGCTCTGGCCAGGACTTA
	c.3872 A>G (Q1291R)	GGAGTGATACCACGGGTGAGCAAAAGGACTTAGCCAG	CTGGCTAAGTCCTTTTGCTCACCCGTGGTATCACTCC
	c.3873 G>C (Q1291H)	CGTGAAGAAAGATGACATCTGGC	GCCTTACTGAGAACAGATCTAGC
	c.164+1G>A (296+1 G>A)	TCAACTAAACAATGTACATGAACATATCTTTCCAATTTTTCAGATAGATTGTC	GACAATCTATCTGAAAAATTGGAAAGATATGTTCATGTACATTGTTTAGTTGA
	c.164+2T>C (296+2 T>C)	TCAACTAAACAATGTACATGAACATGCCTTTCCAATTTTTCAGATAGATTG	CAATCTATCTGAAAAATTGGAAAGGCATGTTCATGTACATTGTTTAGTTGA
	c.165-2A>G (297-2 A>G)	TCC CAC TTT TTA TTC TTT TGC GGA GAA TGG GAT AGA GAG CTG GC	GCC AGC TCT CTA TCC CAT TCT CCG CAA AAG AAT AAA AAG TGG GA
	c.273+1G>A (405+1 G>A)	GTT CTA TGG AAT CTT TTT ATA TTT AGG GAT AAG GAT CTC ATT TGT ACA TTC ATT ATG	CAT AAT GAA TGT ACA AAT GAG ATC CTT ATC CCT AAA TAT AAA AAG ATT CCA TAG AAC
	c.274-1G>A (406-1 G>A)	GTA CTG CTT TGG TGA CTT CTT ACA AAA GGG GAA AAA CAG	CTG TTT TTC CCC TTT TGT AAG AAG TCA CCA AAG CAG TAC
	c.274-2A>G (406-2 A>G)	GCT TTG GTG ACT TCC CAC AAA AGG GGA AAA ACA GAG AAA TTA AAT	ATT TAA TTT CTC TGT TTT TCC CCT TTT GTG GGA AGT CAC CAA AGC
	c.489+1G>T (621+1 G>T)	TAT GTT TAG TTT GAT TTA TAA GAA GTT AAT ACT TCC TTG CAC AGG CC	GGC CTG TGC AAG GAA GTA TTA ACT TCT TAT AAA TCA AAC TAA ACA TA
	c.579+1G>T (711+1 G>T)	CTA AAA GAT TAA ATC AAT AGG TAC ATA ATT CAT CAA ATT TGT TCA GGT TGT TGG A	TCC AAC AAC CTG AAC AAA TTT GAT GAA TTA TGT ACC TAT TGA TTT AAT CTT TTA G
	c.1584+1G>A (1716+1 G>A)	CAA AGC ATG CCA ACT AGA AGA GAT AAG AAA CTA TGT GAA AAC	GTT TTC ACA TAG TTT CTT ATC TCT TCT AGT TGG CAT GCT TTG
	c.1585-1G>A (1717-1G>A)36	previously reported	previously reported
	c.2658-1G>C (2790-1 G>C)	GTC TTG AAG AGG AGT GGT GTA AAG CAA ATA GGA AAT CGT TA	TAA CGA TTT CCT ATT TGC TTT ACA CCA CTC CTC TTC AAG AC
	c.2658-2A>G (2790-2 A>G)	TTT GTC TTG AAG AGG AGT GCC GTA AAG CAA ATA GGA AAT CG	CGA TTT CCT ATT TGC TTT ACG GCA CTC CTC TTC AAG ACA AA
	c.2988+1G>A (3120+1 G>A)36	previously reported	previously reported
	c.3469-2A>G (3601-2 A>G)	AAC AAA AAT GTT GTT ATT TTT ATT TCG GAT GCG ATC TGT GAG CCG AG	CTC GGC TCA CAG ATC GCA TCC GAA ATA AAA ATA ACA ACA TTT TTG TT
	c.3717+1G>A (3849+1 G>A)	CAG TGT TCA AAT CTC ACT CTC TGG CCA GGA CTT A	TAA GTC CTG GCC AGA GAG TGA GAT TTG AAC ACT G
	c.3718-1G>A (3850-1 G>A)	CCA AGA GGC CCA CTT ATA AGG TAA AAG TGA TGG GAT CA	TGA TCC CAT CAC TTT TAC CTT ATA AGT GGG CCT CTT GG
	c.3873+1G>A (4005+1 G>A)	GCT AAG TCC TTT TGC TCA TCT GTG GTA TCA CTC CAA A	TTT GGA GTG ATA CCA CAG ATG AGC AAA AGG ACT TAG C
	c.3873+2T>C (4005+2 T>C)	GCT AAG TCC TTT TGC TCG CCT GTG GTA TCA CTC C	GGA GTG ATA CCA CAG GCG AGC AAA AGG ACT TAG C
	c.4242+2T>C (4374+2 T>C)	CTG GAA TGC CAA CAA TTT TTG GCG AGT CTT TAT AAC TTT ACT TAA G	CTT AAG TAA AGT TAT AAA GAC TCG CCA AAA ATT GTT GGC ATT CCA G
	c.164+3_164+4insT (296+3insT)	CAA TCT ATC TGA AAA ATT GGA AAG GTA TTG TTC ATG TAC ATT GTT TAG TTG A	TCA ACT AAA CAA TGT ACA TGA ACA ATA CCT TTC CAA TTT TTC AGA TAG ATT G
	c.165-3C>T (297-3 C>T)	AGC TCT CTA TCC CAT TCT CTA CAA AAG AAT AAA AAG TGG GAC	GTC CCA CTT TTT ATT CTT TTG TAG AGA ATG GGA TAG AGA GCT
	c.273+3A>C (405+3 A>C)	TTC TAT GGA ATC TTT TTA TAT TTA GGG GTC AGG ATC TCA TTT GTA CAT TC	GAA TGT ACA AAT GAG ATC CTG ACC CCT AAA TAT AAA AAG ATT CCA TAG AA
	c.489+3A>G (621+3 A>G)	TTA GTT TGA TTT ATA AGA AGG TGA TAC TTC CTT GCA CAG GCC C	GGG CCT GTG CAA GGA AGT ATC ACC TTC TTA TAA ATC AAA CTA A
	c.579+3A>G (711+3 A>G)	TTA AAT CAA TAG GTA CAC ACT TCA TCA AAT TTG TTC AGG TTG TTG GAA AGG	CCT TTC CAA CAA CCT GAA CAA ATT TGA TGA AGT GTG TAC CTA TTG ATT TAA
	c.579+3A>C (711+3 A>C)	TTA AAT CAA TAG GTA CAG ACT TCA TCA AAT TTG TTC AGG TTG TTG GAA AGG	CCT TTC CAA CAA CCT GAA CAA ATT TGA TGA AGT CTG TAC CTA TTG ATT TAA
	c.579+3A>T (711+3 A>T)	TTA AAT CAA TAG GTA CAA ACT TCA TCA AAT TTG TTC AGG TTG TTG GAA AGG	CCT TTC CAA CAA CCT GAA CAA ATT TGA TGA AGT TTG TAC CTA TTG ATT TAA
	c.579+5G>A (711+5 G>A)	CTA AAA GAT TAA ATC AAT AGG TAT ATA CTT CAT CAA ATT TGT TCA GGT TGT TGG AAA G	CTT TCC AAC AAC CTG AAC AAA TTT GAT GAA GTA TAT ACC TAT TGA TTT AAT CTT TTA G
	c.2657+2_2657+3insA (2789+2insA)36	previously reported	previously reported
	c.2657+5G>A (2789+5 G>A)36	previously reported	previously reported
	c.3468+2_3468+3insT (3600+2insT)	AGC ATA GAT GTG GAT AGC TTG GTT AAG TCT TAT CAT CTT TTT AAC TT	AAG TTA AAA AGA TGA TAA GAC TTA ACC AAG CTA TCC ACA TCT ATG CT
	c.3468+5G>A (3600+5 G>A)	AGC ATA GAT GTG GAT AGC TTG GTA AAT CTT ATC ATC TTT TTA AC	GTT AAA AAG ATG ATA AGA TTT ACC AAG CTA TCC ACA TCT ATG CT
	c.3717+4A>G (3849+4 A>G)	CCT GGC CAG AGG GTG GGA TTT GAA CAC TGC T	AGC AGT GTT CAA ATC CCA CCC TCT GGC CAG G
	c.3717+5G>A (3849+5 G>A)	CCT GGC CAG AGG GTG AAA TTT GAA CAC TGC TTG	CAA GCA GTG TTC AAA TTT CAC CCT CTG GCC AGG
	c.3718-3T>G (3850-3 T>G)	GTG ATC CCA TCA CTT TTA CCT TAG AGG TGG GCC TCT	AGA GGC CCA CCT CTA AGG TAA AAG TGA TGG GAT CAC
	c.164+28 (296+28 A>G)	TCT AAA TAA TTA ATA ATA TGA ATT TCT CTC CTC AAC TAA ACA ATG TAC ATG AAC ATA CCT	AGG TAT GTT CAT GTA CAT TGT TTA GTT GAG GAG AGA AAT TCA TAT TAT TAA TTA TTT AGA
	c.2620-26A>G (2752-26 A>G)	GGG AGG AAT AGG TGA AGA TGT TAG AAA AAA AGT CAA CTG TGT CTT GTT	AAC AAG ACA CAG TTG ACT TTT TTT CTA ACA TCT TCA CCT ATT CCT CCC
	c.3717+40A>G (3849+40 A>G)	GCTACTGGGATTCACTTACCGAACACAGTCTAACAAAGC	GCTTTGTTAGACTGTGTTCGGTAAGTGAATCCCAGTAGC
